# Supplementary material for: A Full-Spectrum Generative Lead Discovery (FSGLD) Pipeline via DRUG-GAN: A Multiscale Method for Drug-like/Target-specific Compound Library Generation
Source: Research Square preprint supplement (doi:10.21203/rs.3.rs-6516504/v1), 2025-05-12
Supplement: Supplementary file 1 [file 855a3154c24afd25055ff502.docx]

Supplementary Information

A Full-Spectrum Generative Lead Discovery (FSGLD) Pipeline via DRUG-GAN: A Multiscale Method for Drug-like/Target-specific Compound Library Generation

Beihong Ji1, 2, Matthew Brock2, Yuhui Wu2, Yuemin Bian3, Xibing He2, Junmei Wang2*

1Hangzhou Institute of Medicine, Chinese Academy of Sciences, Hangzhou, 310018, Zhejiang, China.

2Department of Pharmaceutical Sciences and Computational Chemical Genomics Screening Center, School of Pharmacy, University of Pittsburgh, Pittsburgh, PA 15261, USA.

3Center for the Development of Therapeutics, Broad Institute of MIT and Harvard, Cambridge, MA 02142, United States

* Corresponding author, [junmei.wang@pitt.edu](mailto:junmei.wang@pitt.edu)

**Supplementary Text**

**Glide Docking.** Selected compounds were docked to CB1/CB2 targets utilizing the Glide [46, 47] docking program built in the Schrodinger software (Maestro 11.2). Prior to docking, the protein target was prepared using the Protein Structure Preparation Wizard module following the standard procedures, including removing water and co-crystal solvent, filling in missing hydrogen atoms, etc. During geometry optimization, only the newly added hydrogen atoms were allowed to move, with the receptor structure being described by the OPLS force field. A grid was generated for each target, using the co-crystallized ligand to define the center of the binding pocket. No rotatable bonds or constraint groups were applied. Flexible docking was performed using Glide's SP scoring function with the main parameters listed below: ligand partial charge cutoff of 0.15, van der Waals scaling factor of 0.80, and applying reward for intramolecular hydrogen bond formation. The best-scoring docking poses were selected and ranked based on docking scores.

**Molecular Dynamics Simulations.** Molecular dynamics (MD) simulations were employed to study the dynamics of CB2 receptor-ligand complexes, followed by molecular mechanics-Poisson Boltzmann surface area-WSAS (MM-PBSA-WSAS) binding free energy calculations1,2. To build the MD system with the protein embedded in a membrane, CHARMM-GUI3 was used to add 240 double-layer 1-palmitoyl-2-oleoyl-sn-glycero-3-phosphocholine (POPC) lipids, approximate 17,000 TIP3P water molecules4, and 0.15 M Na+/Cl- ions into a rectangular box with dimensions of approximately 95 × 95 × 95 Å.

For energy minimizations and MD simulations, we applied different force fields for different types of molecules, specifically, FF14SB for proteins5, GAFF2 for ligands6,7, and Lipid14 for lipids8. The atomic partial charges were assigned using the RESP method9, by fitting HF/6-31G* electrostatic potentials generated with Gaussian 1610. Ligand topologies were created using the Antechamber module11. MD simulations were performed using PMEMD.mpi and PMEMD.cuda from the AMBER 22 suite12-14.

Initially, five rounds of 10,000-step energy minimizations were performed to remove steric clashes, applying positional restraints to the main chain atoms, starting with a force constant of 20 kcal/mol/Å² and gradually reducing it to 0. Following the minimizations, the MD simulations were carried out at 298 K and 1 atm with a time step of 2 femtoseconds. To constrain all hydrogen atoms, the SHAKE algorithm15 was applied. For computational efficiency, each protein-ligand system was subjected to a 10 ns MD simulation, and 60 snapshots were evenly collected in the sampling phase (last 6 ns) for further analysis. All systems reached equilibrium in the first 4 ns.

**MM-PBSA Binding Free Energy Calculations.** Molecular mechanics-Poisson Boltzmann surface area (MM-PBSA) is a widely adopted method for endpoint free energy calculations. To incorporate dynamic effects, MD simulations are commonly used to generate representative conformations. To improve computational efficiency in calculating conformational entropy, which is traditionally computed via normal mode analysis, we developed a solvent-accessible surface area-based method, WSAS, to quickly estimate entropy changes in protein-ligand binding2. Moreover, MM-PBSA binding free energy can be decomposed into distinct interaction components, each of which is calculated from a series of conformational snapshots collected during MD simulations16.

The binding free energy () between a ligand and receptor complex is calculated using the following equation:

Where the term represents the changes in molecular mechanics energy in the gas phase. is the polar solvation free energy, while is the nonpolar solvation free energy, the 𝑇Δ𝑆 is the entropy change of the ligand-target system during the binding process. For each MD snapshot, the binding free energy of each ligand was computed, with detailed energy decompositions performed on all 60 snapshots collected during the sampling phase.

**LRIP Free Energy Prediction.** We employed the previously developed machine learning (ML)-based prediction models using ligand-residue interaction profiles (LRIP) to predict binding free energies17 for ligand targeting the CB1 and CB2 receptors. The optimal computational protocol explored in our earlier work was adopted for LRIP construction. This protocol, referred to as MIN + GB, combines energy minimization (MIN) and the Generalized Born (GB) model to account for solvent effects. It was chosen due to its low computational cost and superior performance compared to alternative simulation protocols and conventional docking algorithms. Full details of the system setup can be found in the original work. In this study, we adhered strictly to the previously established protocol except for one modification: the ABCG2 charges18 was used instead of the AM1-BCC19,20 charges for ligand computations. Ligands with experimentally determined Ki or IC50 values for CB1 and CB2 receptors were obtained from the GPCRdb database (https://gpcrdb.org/). After processing, 580 ligands for CB1 and 1,357 ligands for CB2 were included in the training sets to construct the ML models.

Next, we generated ligand-receptor interaction profile (LRIP) for each ligand. We performed an energy decomposition analysis using the molecular mechanics-Generalized Born surface area (MM-GBSA) method. The optimized ligand-receptor complexes were used as input for MM-GBSA calculations, and binding free energies were decomposed into ligand-residue interactions for residues surrounding the ligand. An internal script was developed to extract ligand-residue interaction energies from the output of the Sander module in the AMBER 22 software package. Residues exhibiting interaction energies below -0.1 kcal/mol were identified as key interacting residues, contributing to the overall binding profile.

Then we trained prediction models using different ML algorithms, including ordinary least squares (LS) regression, Bayesian regression, support vector machine (SVR), random forest (RF), adaptive boosting (Adaboost), gradient boosting decision tree (GBDT) and multilayer perceptron (MLP). The performance of different ML algorithms evaluated using multiple metrics was summarized in **Tables S9-S10**.

**Thermodynamics Integration Free Energy Calculations.** Thermodynamic integration (TI) was employed to compute relative binding free energy differences between ligands, leveraging principles from statistical mechanics.

In TI, the free energy difference between two molecular states, "A" and "B," within a defined environment (e.g., a protein binding site or in solution), is evaluated by introducing a coupling parameter (λ). This parameter smoothly transitions the potential energy function between states. denotes the ensemble average of the derivative of the potential energy with respect to , computed at each intermediate value. The free energy difference is computed by averaging across multiple λ points, and the overall integral is approximated using trapezoidal numerical integration. The details of the methodology have been described extensively elsewhere21,22.

System preparation for all TI simulations was carried out using the FESetup tool (version 1.2.1)23, which was modified to assign RESP charges to ligand molecules, by fitting electrostatic potentials calculated at the HF/6-31G* level using the Gaussian 16 package. Proteins, ligands, and water molecules were described using the ff14SB, GAFF2, and TIP3P force fields, respectively. Atom types and parameters for all ligand molecules were assigned using Antechamber and Parmchk2 from the AmberTools module. Each protein-ligand complex and free ligand system was solvated in a rectangular water box with a minimum buffer distance of 12 Å between the box edges and the nearest atoms of the ligands or complexes.

For compounds containing MCS ii features, the identified CHEMBL1209708 served as the reference state (state A) molecule, and then the other 8 selected ChEMBL and top 9 ZINC compounds served as state B molecules, following the thermodynamic cycle approach21,22,24. The unique atoms in each ligand pair were treated with softcore potentials for both van der Waals and electrostatic interactions to ensure smooth transitions between states. Periodic boundary conditions and the NPT ensemble were employed throughout all simulations. The temperature was maintained at 298 K using Langevin dynamics with a collision frequency of 2.0 ps⁻¹, and the pressure was controlled at 1.01325 bar using the Monte Carlo barostat with a relaxation time of 2 ps. The SHAKE algorithm was disabled for all TI mutations, necessitating a time step of 1 fs in MD simulations. Energy data were recorded every 0.5 ps for subsequent analysis.

Two schedules of λ windows for TI simulations have been compared in this study, the simplest numerical integration (single-window - sw) and the Gaussian quadrature integration (full-window - fw), with the detailed λ values and the associated weights being presented in **Table S11**. For the sw-TI method, the free energy was evaluated by the integrand at the midpoint (λ = 0.5):

While for the fw-TI, the formula for free energy calculation is as follows:

Where is the free energy change at each window and is the associated weight. Initial equilibration for each system was performed using CPU-TI at λ = 0.01592 (or λ = 0.5 for sw-TI) for 100 ps, before switching to GPU-TI for production runs, as the CPU-TI algorithm allows larger fluctuation of box size under NPT ensemble simulations. For fw-TI, five evenly spaced snapshots were extracted from the final 100 ps of the CPU-TI equilibration and used as the starting configurations for five independent GPU-TI simulations at λ =0.01592. Each TI simulation ran for 5 ns, and the snapshot at the end of simulations was used as the starting points for subsequent λ windows, progressing toward the endpoints. Five independent replicas were run for each mutation pair, and relative binding free energies (/) were computed separately for each replica at all λ windows. The final binding free energy ((/) for each ligand was obtained by averaging the results from the five replicas.

To calculate the relative binding free energy using TI, we need to identify a template for the target. For a given target molecule, either from ChEMBL or ZINC database, the template is a ChEMBL compound which shares at least 70% structure similarity and with Ki less than 10 µM. As to which exact template was selected for a given target, we used the rules of thumb in literature, such as the template is typically structurally smaller and highly potent25.

**Radioligand Binding Assays.**

Radioligand binding assays were conducted for CB2 receptor to evaluate the binding affinity of the test compounds. For the promising compound, the same binding assay was also performed for CB1 receptor to evaluate their selectivity. The assays followed established protocols adapted from the scientific literature to ensure reliability and reproducibility (CB126,27, CB228). Reference standards were included in each assay to validate the results.

For the CB2 receptor assays, human recombinant cannabinoid CB2 receptor expressed in CHO-K1 cells (Eurofins Panlabs Discovery Services Taiwan) was employed. The assays were conducted in modified HEPES buffer at pH 7.0 (20 mM HEPES, 0.5% BSA). Membrane aliquots (11.2 µg) were incubated with 2.4 nM [3H]WIN-55,212-2 (American Radiolabeled Chemicals) for 90 minutes at 37°C. After incubation, membranes were filtered and washed four times using 0.3% PEI-pretreated GF/C filters, and bound [3H]WIN-55,212-2 was measured. Non-specific binding was estimated in the presence of 10 µM R(+)-WIN-55,212-2. Test compounds were screened across various concentrations, and data were analyzed using non-linear regression with MathIQ™ (ID Business Solutions Ltd., UK).

As to the CB1 receptor assays, human recombinant cannabinoid CB1 receptors expressed in rat hematopoietic Chem-1 cells (Eurofins Discovery Services) were used. The assays were conducted in modified Tris-HCl buffer at pH 7.4 (50 mM HEPES, 5 mM MgCl2, 1 mM CaCl2, 0.2% BSA). Membrane aliquots (8 µg) were incubated with 2 nM [3H]SR141716A (Revvity/PerkinElmer) for 60 minutes at 37°C. After incubation, the membranes were filtered and washed four times using 0.3% PEI-pretreated GF/C filters, and the bound [3H]SR141716A was quantified. Non-specific binding was determined in the presence of 10 µM CP 55,940. Test compounds were screened across a range of concentrations, and the resulting data were analyzed using non-linear regression via MathIQ™ (ID Business Solutions Ltd., UK).

**References**

1 Wang, J., Morin, P., Wang, W. & Kollman, P. A. Use of MM-PBSA in reproducing the binding free energies to HIV-1 RT of TIBO derivatives and predicting the binding mode to HIV-1 RT of efavirenz by docking and MM-PBSA. *J. Am. Chem. Soc.* **123**, 5221-5230 (2001).

2 Wang, J. & Hou, T. Develop and Test a Solvent Accessible Surface Area-Based Model in Conformational Entropy Calculations. *J. Chem. Inf. Model* **52**, 1199-1212 (2012). <https://doi.org:10.1021/ci300064d>

3 Jo, S., Kim, T., Iyer, V. G. & Im, W. CHARMM-GUI: a web-based graphical user interface for CHARMM. *J. Comput. Chem.* **29**, 1859-1865 (2008). <https://doi.org:10.1002/jcc.20945>

4 Jorgensen, W. L., Chandrasekhar, J., Madura, J. D., Impey, R. W. & Klein, M. L. Comparison of simple potential functions for simulating liquid water. *J. Chem. Phys.* **79**, 926-935 (1983). <https://doi.org:10.1063/1.445869>

5 Maier, J. A. *et al.* ff14SB: Improving the Accuracy of Protein Side Chain and Backbone Parameters from ff99SB. *J. Chem. Theory Comput.* **11**, 3696-3713 (2015). <https://doi.org:10.1021/acs.jctc.5b00255>

6 Wang, J., Wolf, R. M., Caldwell, J. W., Kollman, P. A. & Case, D. A. Development and testing of a general amber force field. *J. Comput. Chem.* **25**, 1157-1174 (2004). <https://doi.org:10.1002/jcc.20035>

7 He, X., Man, V. H., Yang, W., Lee, T. S. & Wang, J. A fast and high-quality charge model for the next generation general AMBER force field. *J Chem Phys* **153**, 114502 (2020). <https://doi.org:10.1063/5.0019056>

8 Dickson, C. J. *et al.* Lipid14: The Amber Lipid Force Field. *J. Chem. Theory Comput.* **10**, 865-879 (2014). <https://doi.org:10.1021/ct4010307>

9 Bayly, C. I., Cieplak, P., Cornell, W. & Kollman, P. A. A well-behaved electrostatic potential based method using charge restraints for deriving atomic charges: the RESP model. *J. Phys. Chem.* **97**, 10269-10280 (1993). <https://doi.org:10.1021/j100142a004>

10 Gaussian 16 Rev. B.01 (Wallingford, CT, 2016).

11 Wang, J., Wang, W., Kollman, P. A. & Case, D. A. Automatic atom type and bond type perception in molecular mechanical calculations. *J. Mol. Graph Model* **25**, 247-260 (2006). <https://doi.org:10.1016/j.jmgm.2005.12.005>

12 AMBER 2016 (University of California, San Francisco, 2016).

13 Gotz, A. W. *et al.* Routine Microsecond Molecular Dynamics Simulations with AMBER on GPUs. 1. Generalized Born. *J. Chem. Theory Comput.* **8**, 1542-1555 (2012). <https://doi.org:10.1021/ct200909j>

14 Salomon-Ferrer, R., Gotz, A. W., Poole, D., Le Grand, S. & Walker, R. C. Routine Microsecond Molecular Dynamics Simulations with AMBER on GPUs. 2. Explicit Solvent Particle Mesh Ewald. *J. Chem. Theory Comput.* **9**, 3878-3888 (2013). <https://doi.org:10.1021/ct400314y>

15 Ryckaert, J.-P., Ciccotti, G. & Berendsen, H. Numerical-Integration of Cartesian Equations of Motion of a System with Constraints – Molecular-Dynamics of N-Alkanes. *Journal of Computational Physics* **23**, 327-341 (1977). <https://doi.org:10.1016/0021-9991(77)90098-5>

16 Xu, L., Sun, H., Li, Y., Wang, J. & Hou, T. Assessing the Performance of MM/PBSA and MM/GBSA Methods. 3. The Impact of Force Fields and Ligand Charge Models. *J. Phys. Chem. B.* **117**, 8408-8421 (2013). <https://doi.org:10.1021/jp404160y>

17 Ji, B. *et al.* Machine learning on ligand-residue interaction profiles to significantly improve binding affinity prediction. *Briefings in Bioinformatics* **22** (2021). <https://doi.org:10.1093/bib/bbab054>

18 Sun, Y. *et al.* Development and test of highly accurate endpoint free energy methods. 1: Evaluation of ABCG2 charge model on solvation free energy prediction and optimization of atom radii suitable for more accurate solvation free energy prediction by the PBSA method. *Journal of Computational Chemistry* **44**, 1334-1346 (2023). <https://doi.org:https://doi.org/10.1002/jcc.27089>

19 Jakalian, A., Bush, B. L., Jack, D. B. & Bayly, C. I. Fast, efficient generation of high-quality atomic charges. AM1-BCC model: I. Method. **21**, 132-146 (2000). <https://doi.org:10.1002/(sici)1096-987x(20000130)21:2><132::Aid-jcc5>3.0.Co;2-p

20 Jakalian, A., Jack, D. B. & Bayly, C. I. Fast, efficient generation of high-quality atomic charges. AM1-BCC model: II. Parameterization and validation. **23**, 1623-1641 (2002). <https://doi.org:10.1002/jcc.10128>

21 Pearlman, D. A. & Charifson, P. S. Are Free Energy Calculations Useful in Practice? A Comparison with Rapid Scoring Functions for the p38 MAP Kinase Protein System. *Journal of Medicinal Chemistry* **44**, 3417-3423 (2001). <https://doi.org:10.1021/jm0100279>

22 Michel, J., Verdonk, M. L. & Essex, J. W. Protein-Ligand Binding Affinity Predictions by Implicit Solvent Simulations:  A Tool for Lead Optimization? *Journal of Medicinal Chemistry* **49**, 7427-7439 (2006). <https://doi.org:10.1021/jm061021s>

23 Loeffler, H. H., Michel, J. & Woods, C. FESetup: Automating Setup for Alchemical Free Energy Simulations. *J Chem Inf Model* **55**, 2485-2490 (2015). <https://doi.org:10.1021/acs.jcim.5b00368>

24 Jorgensen, W. L. The many roles of computation in drug discovery. *Science* **303**, 1813-1818 (2004). <https://doi.org:10.1126/science.1096361>

25 He, X. *et al.* Fast, Accurate, and Reliable Protocols for Routine Calculations of Protein–Ligand Binding Affinities in Drug Design Projects Using AMBER GPU-TI with ff14SB/GAFF. *ACS Omega* **5**, 4611-4619 (2020). <https://doi.org:10.1021/acsomega.9b04233>

26 Melck, D. *et al.* Suppression of nerve growth factor Trk receptors and prolactin receptors by endocannabinoids leads to inhibition of human breast and prostate cancer cell proliferation. *Endocrinology* **141**, 118-126 (2000). <https://doi.org:10.1210/endo.141.1.7239>

27 Jung, M. *et al.* Characterization of CB1 receptors on rat neuronal cell cultures: binding and functional studies using the selective receptor antagonist SR 141716A. *J Neurochem* **68**, 402-409 (1997). <https://doi.org:10.1046/j.1471-4159.1997.68010402.x>

28 Munro, S., Thomas, K. L. & Abu-Shaar, M. Molecular characterization of a peripheral receptor for cannabinoids. *Nature* **365**, 61-65 (1993). <https://doi.org:10.1038/365061a0>

**Supplemental Figure**


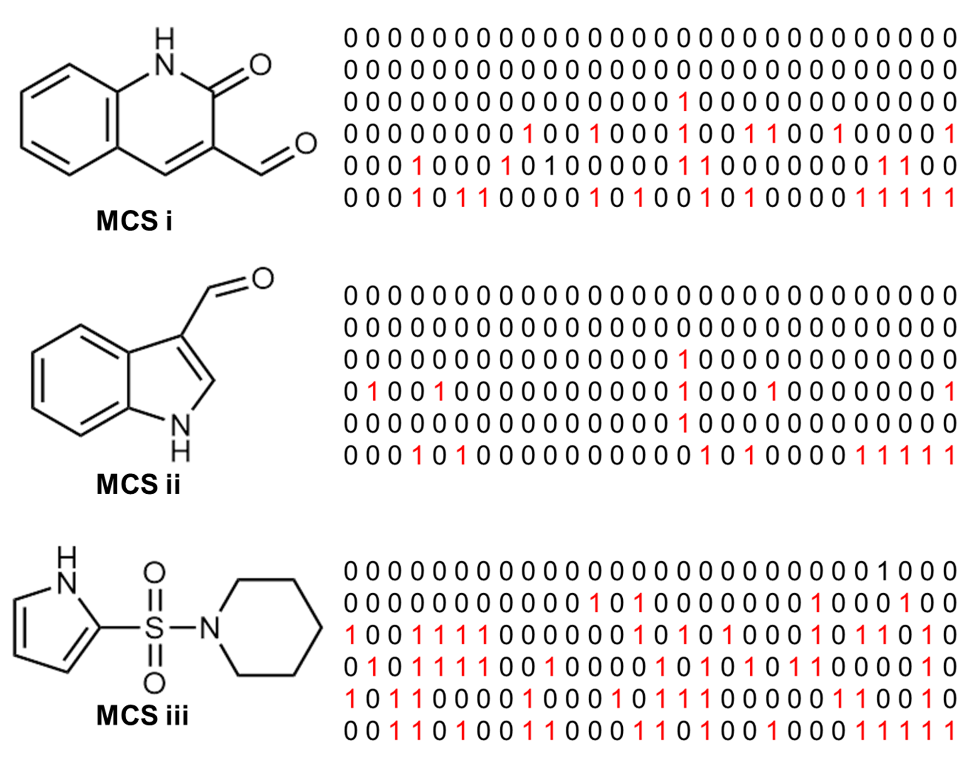


**Fig. S1 Top three MCSs and MACCS**

**Supplemental Tables**

**Table S1. The performance of the discrimintor in dcGAN trained using different architectures.** For a given performance metrix, the value is the average of 10-fold cross validation.

| **Neural Network** | **AUC** | **Accuracy** | **F1-score** | **Precision** | **Recall** |
| --- | --- | --- | --- | --- | --- |
| LeNet 5 | 0.88 | 0.81 | 0.81 | 0.82 | 0.79 |
| AlexNet | 0.94 | 0.87 | 0.87 | 0.88 | 0.85 |
| ZFNet | 0.86 | 0.78 | 0.78 | 0.80 | 0.75 |
| VGGNet11 | 0.65 | 0.53 | 0.66 | 0.52 | 0.91 |
| VGGNet13 | 0.68 | 0.62 | 0.65 | 0.62 | 0.71 |
| VGGNet16 | 0.65 | 0.58 | 0.64 | 0.57 | 0.75 |

Table S2 Selected Top ZINC Compounds According to the QED Druglike Metrics.

| **Molecule** | **MW** | **logP** | **TPSA** | **QED** | **TS** |
| --- | --- | --- | --- | --- | --- |
| ZINC63855506 | 303.431 | 2.828 | 48.990 | 0.948 | 0.708 |
| ZINC71836518 | 302.374 | 2.818 | 54.560 | 0.948 | 0.702 |
| ZINC19852625 | 301.415 | 2.757 | 45.230 | 0.948 | 0.700 |
| ZINC19117964 | 301.365 | 2.597 | 48.990 | 0.948 | 0.705 |
| ZINC89661821 | 307.806 | 3.037 | 45.230 | 0.948 | 0.708 |
| ZINC47073394 | 313.401 | 2.838 | 58.220 | 0.948 | 0.702 |
| ZINC89814317 | 310.401 | 3.072 | 50.160 | 0.948 | 0.710 |
| ZINC92589586 | 304.781 | 3.116 | 50.160 | 0.948 | 0.700 |
| ZINC77303792 | 313.376 | 2.898 | 59.220 | 0.948 | 0.704 |
| ZINC71970254 | 298.390 | 2.971 | 50.160 | 0.947 | 0.702 |
| ZINC12544729 | 298.390 | 2.606 | 59.810 | 0.947 | 0.702 |
| ZINC55928065 | 297.402 | 3.078 | 48.990 | 0.947 | 0.710 |

Table S3 Selected Top ZINC Compounds According to the Structural Similarity Score.

| **Molecule** | **MW** | **logP** | **TPSA** | **QED** | **TS** |
| --- | --- | --- | --- | --- | --- |
| ZINC01081597 | 295.299 | -1.748 | 105.380 | 0.696 | 0.848 |
| ZINC37449194 | 363.805 | 0.554 | 96.150 | 0.690 | 0.839 |
| ZINC02437843 | 363.805 | 0.919 | 104.940 | 0.565 | 0.833 |
| ZINC92191757 | 401.467 | 1.004 | 103.310 | 0.584 | 0.823 |
| ZINC10385107 | 407.858 | 0.938 | 103.310 | 0.565 | 0.822 |
| ZINC28869273 | 385.448 | -1.508 | 100.590 | 0.507 | 0.822 |
| ZINC12324327 | 405.458 | 3.313 | 104.290 | 0.510 | 0.822 |
| ZINC87360737 | 387.440 | 0.695 | 103.310 | 0.590 | 0.821 |
| ZINC90100884 | 387.440 | 0.695 | 103.310 | 0.590 | 0.821 |
| ZINC88510547 | 389.459 | 3.613 | 95.060 | 0.544 | 0.821 |
| ZINC20509006 | 363.805 | 0.919 | 104.940 | 0.565 | 0.821 |
| ZINC09126041 | 401.467 | 1.895 | 103.170 | 0.568 | 0.819 |

Table S4. The Docking and Similarity Scores of Selected Top CB2 Active Candidates from ZINC Database. Docking Score Is in kcal/mol.

| **Molecule** | **CB2 Docking Score** | **CB1 Docking Score** | **Tanimoto Score** |
| --- | --- | --- | --- |
| ZINC38533996 | -12.97 | -9.54 | 0.85 |
| ZINC38534068 | -12.90 | -9.37 | 0.86 |
| ZINC12163344 | -12.62 | -8.13 | 0.88 |
| ZINC14882156 | -12.22 | -9.37 | 0.85 |
| ZINC77321744 | -12.00 | -10.60 | 0.85 |
| ZINC72402087 | -11.98 | -10.32 | 0.86 |
| ZINC38534026 | -11.90 | -9.43 | 0.85 |
| ZINC11968663 | -11.70 | -10.10 | 0.85 |
| ZINC09125498 | -11.60 | -10.31 | 0.87 |
| ZINC12242275 | -11.59 | -7.51 | 0.87 |
| ZINC06756714 | -11.54 | -10.04 | 0.86 |
| ZINC29419331 | -11.47 | -10.80 | 0.85 |

Table S5. The docking and similarity scores of selected top CB2 active candidates with MCS i feature from ZINC database

| **Molecule** | **CB2 Docking score** | **CB1 Docking score** | **TS** |
| --- | --- | --- | --- |
| ZINC72469974 | -10.08 | -8.00 | 0.82 |
| ZINC91152990 | -7.82 | -6.75 | 0.77 |
| ZINC69537317 | -8.93 | -9.30 | 0.77 |
| ZINC71836805 | -9.39 | -9.19 | 0.77 |
| ZINC71836806 | -9.32 | -9.45 | 0.77 |
| ZINC77505253 | -10.56 | -9.86 | 0.77 |
| ZINC77505252 | -10.24 | -9.44 | 0.77 |
| ZINC71747425 | -9.36 | -9.369 | 0.77 |
| ZINC92076350 | -10.56 | -9.55 | 0.77 |
| ZINC69489680 | -10.11 | -9.07 | 0.77 |
| ZINC71752134 | -9.35 | -9.82 | 0.77 |
| ZINC71752133 | -10.00 | -10.03 | 0.77 |

Table S6 The Glide docking scores and similarity scores of selected top CB2 active candidates containing MCS ii substructure from the ZINC database. Docking scores are in kcal/mol.

| Molecule | CB2 Docking score | CB1 Docking score | TS |
| --- | --- | --- | --- |
| ZINC24299219 | -11.03 | -10.04 | 0.82 |
| ZINC34847913 | -9.72 | -9.49 | 0.82 |
| ZINC49413728 | -8.86 | -4.78 | 0.82 |
| ZINC04788921 | -9.83 | -9.87 | 0.81 |
| ZINC74199659 | -9.14 | -9.83 | 0.81 |
| ZINC72403380 | -10.18 | -7.12 | 0.81 |
| ZINC72403381 | -10.55 | -9.91 | 0.81 |
| ZINC77179032 | -10.34 | -10.34 | 0.81 |
| ZINC04788914 | -10.24 | NA | 0.81 |

Table S7. The experimental and predicted binding free energies of a set of ChEMBL compounds targeting to the CB2 receptor. The docking scores and free energies are in kcal/mol.

| Compound |  | Glide |  |  |  |  |  |  |
| --- | --- | --- | --- | --- | --- | --- | --- | --- |
| CHEMBL1209708 | -12.38 | -10.38 | -10.81 | -21.61 | Ref | Ref | Ref | Ref |
| CHEMBL310431 | -10.41 | -10.72 | -10.09 | -18.83 | 1.92 | -0.04 | -10.46 | -12.42 |
| CHEMBL80439 | -10.23 | -10.61 | -9.76 | -21.06 | 1.24 | 1.42 | -11.14 | -10.96 |
| CHEMBL431363 | -10.25 | -10.69 | -10.43 | -20.75 | 0.41 | 4.63 | -11.96 | -7.74 |
| CHEMBL432750 | -10.05 | -10.94 | -10.21 | -19.95 | 3.92 | -2.12 | -8.46 | -14.5 |
| CHEMBL2112291 | -9.82 | -9.83 | -9.4 | -15.43 | 2.61 | 3.28 | -9.77 | -9.1 |
| CHEMBL418916 | -10.09 | -9.95 | -9.59 | -19.07 | -1.21 | 1.13 | -13.59 | -11.24 |
| CHEMBL312093 | -8.98 | -9.5 | -9.99 | -10.97 | 3.44 | 3.9 | -8.94 | -8.48 |
| CHEMBL310766 | -8.95 | -11.36 | -9.66 | -17.17 | 6.37 | 6.77 | -6.01 | -5.6 |

Table S8. The predicted binding energies of a set of ZINC compounds targeting to CB2 using different computational methods. All docking scores and free energies are in kcal/mol.

| **Compound** | **Glide** |  |  |  |
| --- | --- | --- | --- | --- |
| ZINC04788914 | -10.24 | -11.27 | -11.19 | -2.92 |
| ZINC04788921 | -9.83 | -9.67 | -10.23 | -6.46 |
| ZINC24299219 | -11.03 | -10.51 | -10.21 | -7.69 |
| ZINC34847913 | -9.72 | -11.03 | -5.25 | -5.22 |
| ZINC49413728 | -8.86 | -9.1 | -11.56 | -6.12 |
| ZINC72403380 | -10.18 | -9.94 | -9.52 | 2.17 |
| ZINC72403381 | -10.55 | -10.5 | -11.37 | 5.43 |
| ZINC74199659 | -9.14 | -10.37 | -1.22 | -4.48 |

**Table S9 The performance metrics of ML-based SFs for CB1**

|  | RMSE | MAE | CORR | CORR2 | PI |
| --- | --- | --- | --- | --- | --- |
| LS | 1.38 | 1.07 | 0.46 | 0.21 | 0.51 |
| Bayesian | 1.23 | 0.98 | 0.52 | 0.27 | 0.54 |
| SVR | 1.24 | 0.99 | 0.50 | 0.25 | 0.50 |
| RF | 1.09 | 0.87 | 0.67 | 0.44 | 0.66 |
| Adaboost | 1.07 | 0.86 | 0.66 | 0.44 | 0.68 |
| GBDT | 1.06 | 0.84 | 0.67 | 0.45 | 0.67 |
| MLP | 1.36 | 1.10 | 0.51 | 0.26 | 0.50 |

**Table S10 The performance metrics of ML-based SFs for CB2**

|  | RMSE | MAE | CORR | CORR2 | PI |
| --- | --- | --- | --- | --- | --- |
| LS | 1.07 | 0.88 | 0.41 | 0.17 | 0.40 |
| Bayesian | 1.10 | 0.93 | 0.32 | 0.11 | 0.33 |
| SVR | 1.07 | 0.90 | 0.39 | 0.15 | 0.39 |
| RF | 1.03 | 0.88 | 0.50 | 0.25 | 0.50 |
| Adaboost | 1.11 | 0.93 | 0.37 | 0.14 | 0.39 |
| GBDT | 0.97 | 0.81 | 0.56 | 0.31 | 0.55 |
| MLP | 1.19 | 0.94 | 0.35 | 0.12 | 0.36 |

**Table S11. Schedules of windows for TI in this study**

| **No. of** |  | ***w*i** | **Integration method** |
| --- | --- | --- | --- |
| 1 | 0.5 | - | Single-Window |
| 9 | 0.01592, 0.08198, 0.19331, 0.33787, 0.5, 0.66213, 0.80669, 0.91802, 0.98408 | 0.04064, 0.09032, 0.13031, 0.15617, 0.16512, 0.15617, 0.13031, 0.09032, 0.04064 | Full-Window (Gaussian quadrature) |
